# Supplementary material for: Nitrogen and oxygen availabilities control water column nitrous oxide production during seasonal anoxia in the Chesapeake Bay
Source: Copernicus journal article supplement (doi:10.5194/bg-15-6127-2018), 2018-10-18
Supplement: Supplementary file 1 [file bg-15-6127-2018-supplement.zip]

Archive with 2 entries (2 files):
- bg-15-6127-2018-supplement-title-page.pdf
- bg-2018-113-DataDeposit.xls
