# Supplementary material for: Nitrogen and oxygen availabilities control water column nitrous oxide production during seasonal anoxia in the Chesapeake Bay
Source: Copernicus journal article supplement (doi:10.5194/bg-15-6127-2018), 2018-10-18
Supplement: Supplementary file 1 [file bg-15-6127-2018-supplement.zip › bg-15-6127-2018-supplement-title-page.pdf]

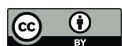

*Supplement of*

**Nitrogen and oxygen availabilities control water column nitrous oxide production during seasonal anoxia in the Chesapeake Bay**

**Qixing Ji et al.**

*Correspondence to:* Qixing Ji ([qji@princeton.edu](mailto:qji@princeton.edu))

- [bg-15-6127-2018-supplement-title-page.pdf](#)
- [bg-2018-113-DataDeposit.xls](#)

The copyright of individual parts of the supplement might differ from the CC BY 4.0 License.
