# Supplementary material for: Nitrogen and oxygen availabilities control water column nitrous oxide production during seasonal anoxia in the Chesapeake Bay
Source: Copernicus journal article supplement (doi:10.5194/bg-15-6127-2018), 2018-10-18
Supplement: Supplementary file 1 [file bg-2018-113-DataDeposit.xls]

## Sheet: bg-2018-113
Water column hydrography
Trip	Depth (m)	Salinity (PSU)	In situ temp. (C)	O2(μM)		Depth (m)	[N2O] (nM)	nirS Copies (copies/ml)	stdev nirS copies		Depth (m)	[NO3] μM	[NO2] μM
July 2016	0.38	15.73	28.44	242.52		17.3	2.03				14.13	0.02	0.02
July 2016	0.626	16.16	28	242.52		17.3	1.81				17.3	0.02	0.02
July 2016	2.98	15.76	27.88	242.52		14.13	3.73	59134	1115		12.4	0.02	0.02
July 2016	3.41	16.24	27.84	179.06		14.13	3.57				2.98	0.02	0.02
July 2016	6.37	16.31	27.78	174.06		12.4	3.31				0.38	0.02	0.02
July 2016	8.34	16.57	27.21	114.38		12.4	3.1
July 2016	9.87	19.54	24.78	39.06		2.98	6.72
July 2016	10.73	20.32	24.34	5		2.98	6.75
July 2016	12.09	20.66	24.1	5		0.38	6.6
July 2016	12.7	20.84	24.04	5		0.38	6.67
July 2016	13.7	21.23	23.93	5
July 2016	14.13	20.94	23.9	5
July 2016	14.85	21.57	23.86	5
July 2016	15.74	21.6	23.06	5
July 2016	17.3	21.14	23.81	5
Trip	Depth(m)	Salinity (PSU)	In situ temp(⁰C)	O2(μM)		Depth (m)	[N2O] (nM)	nirS Copies (copies/ml)	stdev nirS copies		Depth (m)	[NO3] μM	[NO2] μM
November 2016	17	22.47	15.21	188.42		17	11.02	25494	601		17	5.03	0.4
November 2016	17	22.47	15.21	188.42		17	11.15				17	5.08	0.4
November 2016	14	22.21	15.1	189.7		14	11.23				14	4.6	0.35
November 2016	14	22.21	15.1	189.7		14	11.22				14	4.6	0.35
November 2016	11	21.91	15	188.1		11	11.23				11	2.67	0.3
November 2016	11	21.91	15	188.1		11	11.38				11	2.67	0.3
November 2016	8	20.05	13.66	264.88		8	11.33				8	0.63	0.18
November 2016	8	20.05	13.66	264.88		8	11.23				8	0.63	0.18
November 2016	3	19.77	13.5	277.99		3	11.18				3	0.87	0.01
November 2016	3	19.77	13.5	277.99		3	11.31				3	0.87	0.01
November 2016	3	19.77	13.5	277.99		3	11.46				3	0.87	0.01
Trip	Depth(m)	Salinity (PSU)	In situ temp(⁰C)	O2(μM)		Depth (m)	[N2O] (nM)	nirS Copies (copies/ml)	stdev nirS copies		Depth (m)	[NO3] μM	[NO2] μM
May 2017	19.5	20.71	11.17	87.97		19.5	9.85	9100	1322		19.5	6.31	0.36
May 2017	18.29	20.65	11.15	85.73		19.5	9.67				15.8	7.94	0.27
May 2017	15.8	20.43	11.25	93.41		15.8	9.87				10.9	15.75	0.61
May 2017	13.71	18.44	11.3	102.05		15.8	10.07				8	19.61	0.46
May 2017	10.9	16.17	11.68	193.54		10.9	11.26				3	19.53	0.48
May 2017	9.14	13.65	11.7	209.85		10.9	10.9
May 2017	8	13.4	11.6	249.2		8	9.36
May 2017	6.24	12.95	10.64	277.03		8	9.54
May 2017	3	13.06	10.53	283.11		3	9.1
May 2017	0.54	13.05	10.46	287.59		3	9.14
DIN manipulation experiment
Trip	[NO2](uM)	[NO3](uM)	Rate (NO2/NO3)	stdev.rate ratio
July 2016	4.42	4.42	0.64	0.32
July 2016	0.88	8.85	0.33	0.19
July 2016	0.88	2.65	0.34	0.16
July 2016	2.65	0.88	4	0.72
July 2016	8.85	0.88	12.92	4.35
O2 manipulation experiment
Trip	[O2](μM)	NO2-rate(nM/hr)	stdev NO2- rate	NO3-rate(nM/hr)	stdev NO3- rate
July 2016	0.01	5.42	0.35	2.04	0.86
July 2016	0.27	2.78	1.14	3.48	1.31
July 2016	0.64	0.21	0.31	0	0.03
July 2016	1.28	0.54	0.28	0.01	0.01
July 2016	2.57	0.31	0.05	0	0.03
July 2016	6.42	0.12	0.02	0	0.05
Trip	[O2](μM)	NO2-rate(nM/hr)	stdev NO2- rate	NO3-rate(nM/hr)	stdev NO3- rate
November 2016	0	0.33	0	0.95	0.35
November 2016	0.15	0.13	0.03	0	0
November 2016	0.41	0.02	0.01	0	0
November 2016	1.9	0.01	0.03	0	0
November 2016	4.2	0	0	0	0
November 2016	7.3	0	0	0	0
O2 manipulation experiment - nitrate reduction to nitrite
Trip	[O2](μM)	NO3 reduction rate (nM/hr)	stdev. NO3 reduction rate
July 2016	0	99.41	17.02
July 2016	0.26	205.01	29.91
July 2016	0.64	13.72	5.09
July 2016	1.23	1.52	0.1
July 2016	2.57	1.98	0.11
July 2016	6.42	0.82	0.06
